# Supplementary material for: Association Between Depression and Condom Use Differs by Sexual Behavior Group in Patients with HIV
Source: Springer Nature journal article supplement (doi:10.1007/s10461-016-1610-8), 2016-11-23
Supplement: MOESM1 [file 11089928]

Table S1: Association between Depression (CESD-Score*>*16) and Dichotomous Non-Condom Use

|  | Odds Ratio (OR) (95% Confidence Interval) | | | |
| --- | --- | --- | --- | --- |
| All  (N=1255) | Men sex with men  (N=716) | Heterosexual Men  (N=262) | Heterosexual Women  (N=277) |
| Unadjusted OR  -- HIV-infected regular partner  -- No HIV-infected regular partner | 1.31 (0.93-1.84)  **1.55 (1.23-1.96)** | 1.26 (0.80-1.99)  **1.66 (1.20-2.31)** | ---**  1.73 (0.98-3.08) | 0.92 (0.46-2.06)  1.22 (0.82-1.83) |
| OR adjusted for age and race  -- HIV-infected regular partner  -- No HIV-infected regular partner | 1.44 (1.00-2.07)  **1.57 (1.25-1.99)** | 1.32 (0.82-2.12)  **1.74 (1.25-2.42)** | --**  1.69 (0.94-2.99) | 0.93 (0.40-2.16)  1.21 (0.82-1.80) |

* Bold indicates statistical significance by exclusion of 1.0 from the 95% confidence interval

** estimates did not converge due to small sample size (n=61)
